# Supplementary figures and images for: Multi-Elemental Analysis of Human Optic Chiasm—A New Perspective to Reveal the Pathomechanism of Nerve Fibers’ Degeneration
Source: MDPI journal article supplement (doi:10.3390/ijerph19074420), 2022-04-06

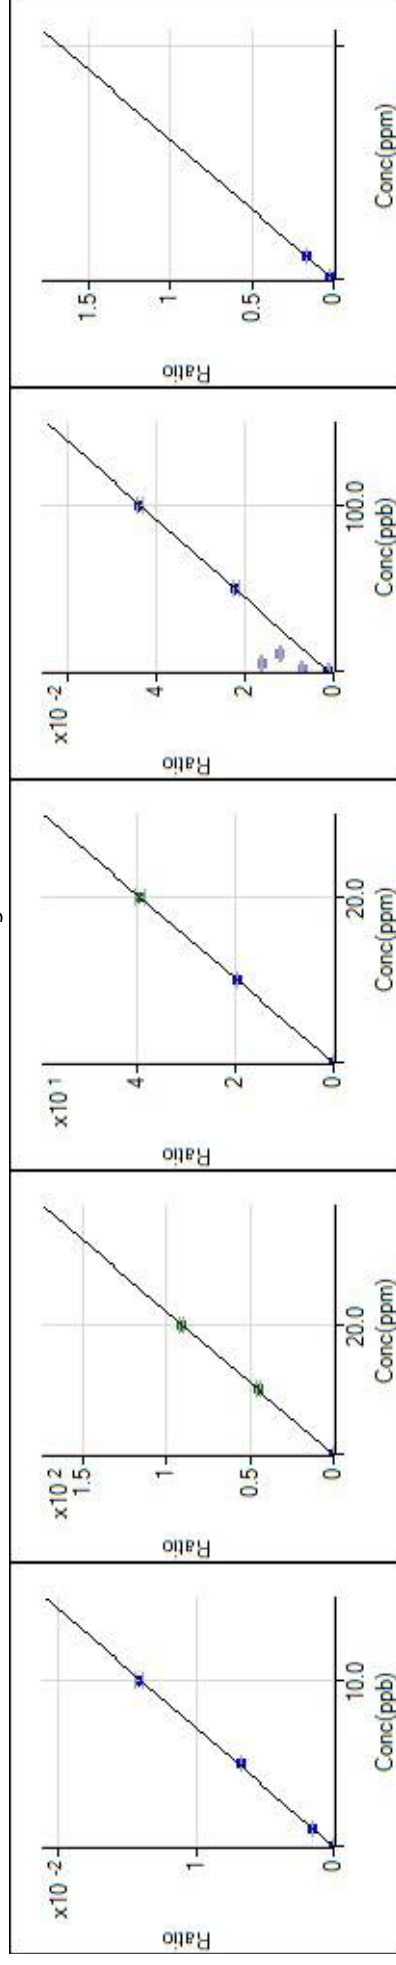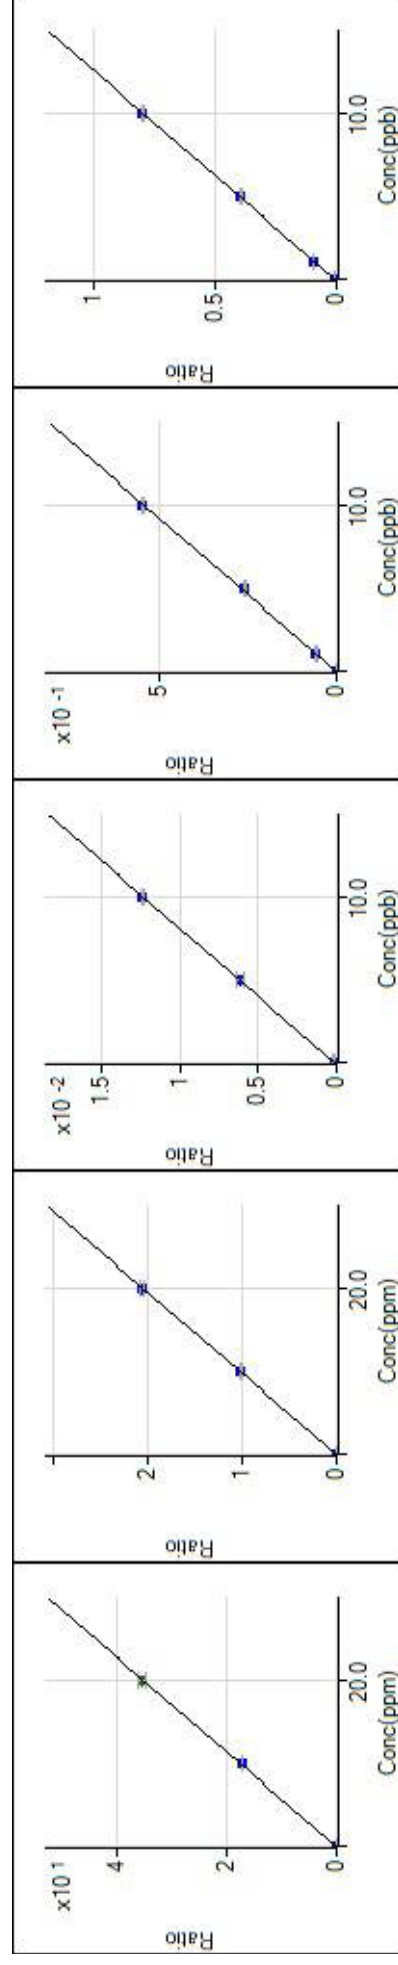

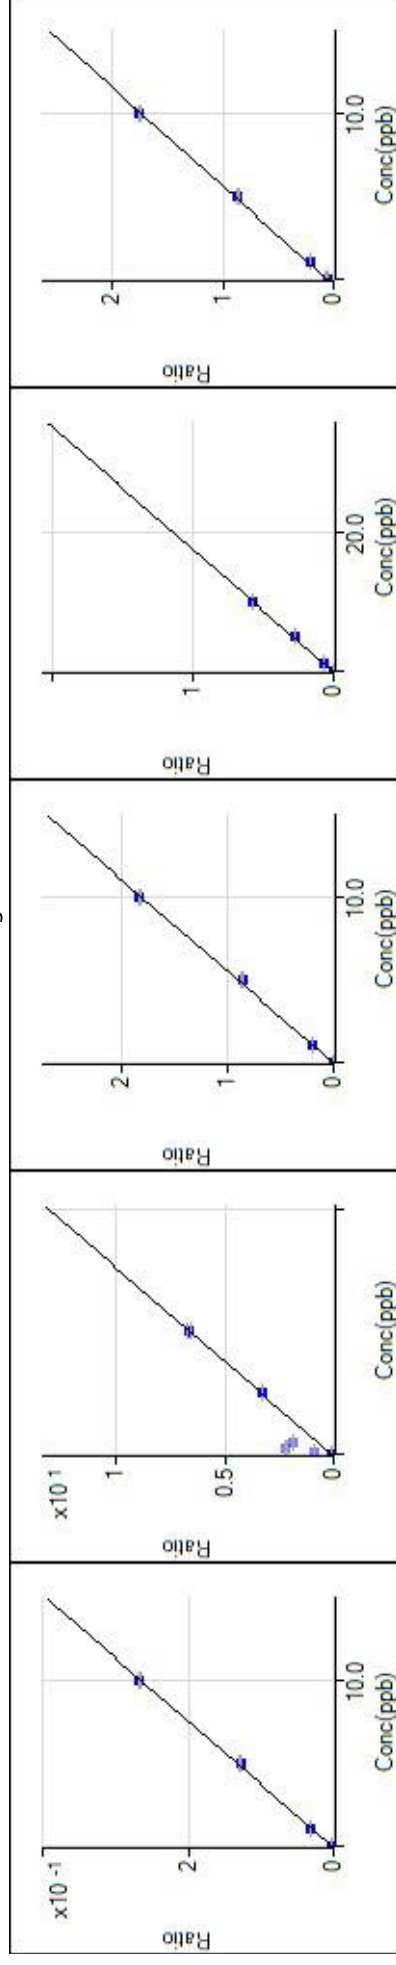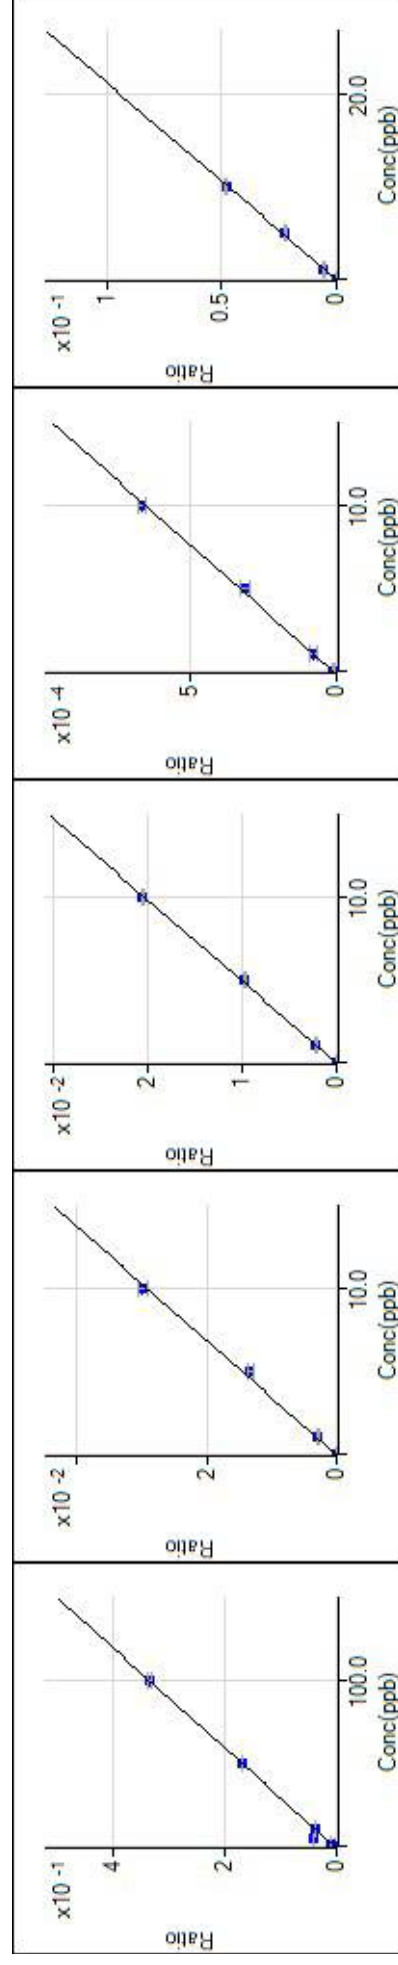

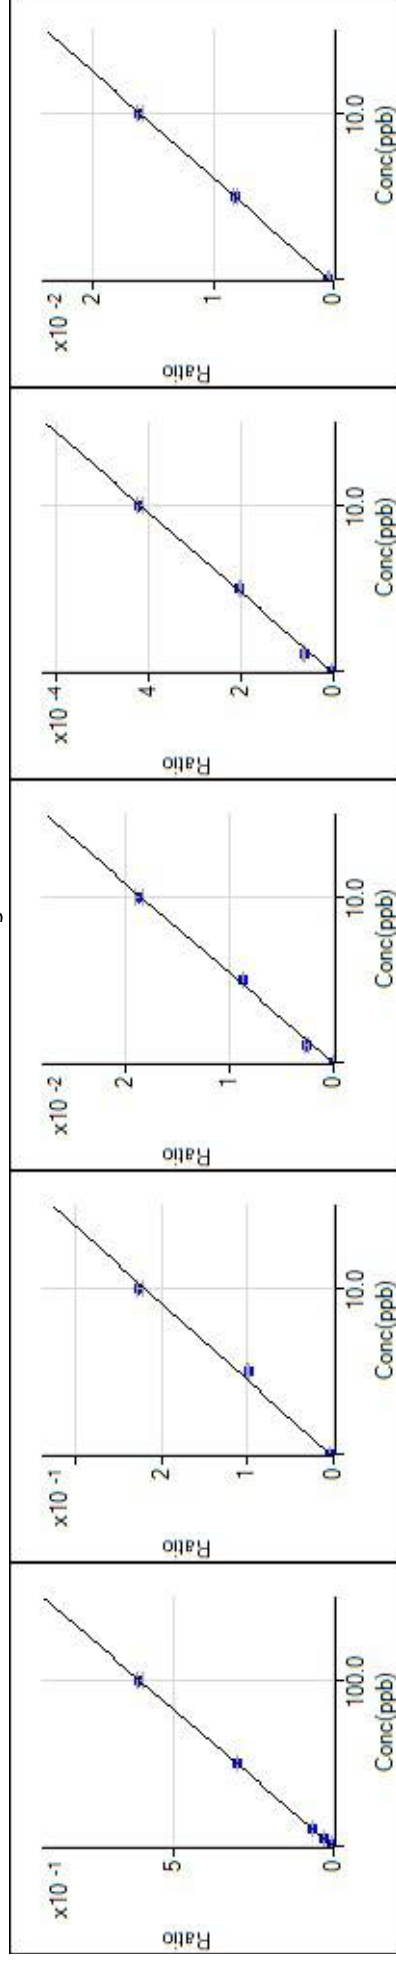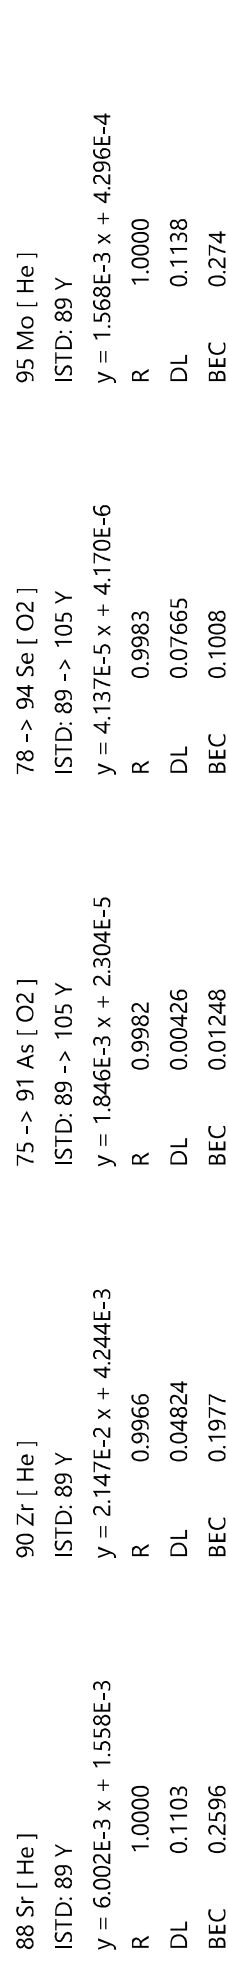

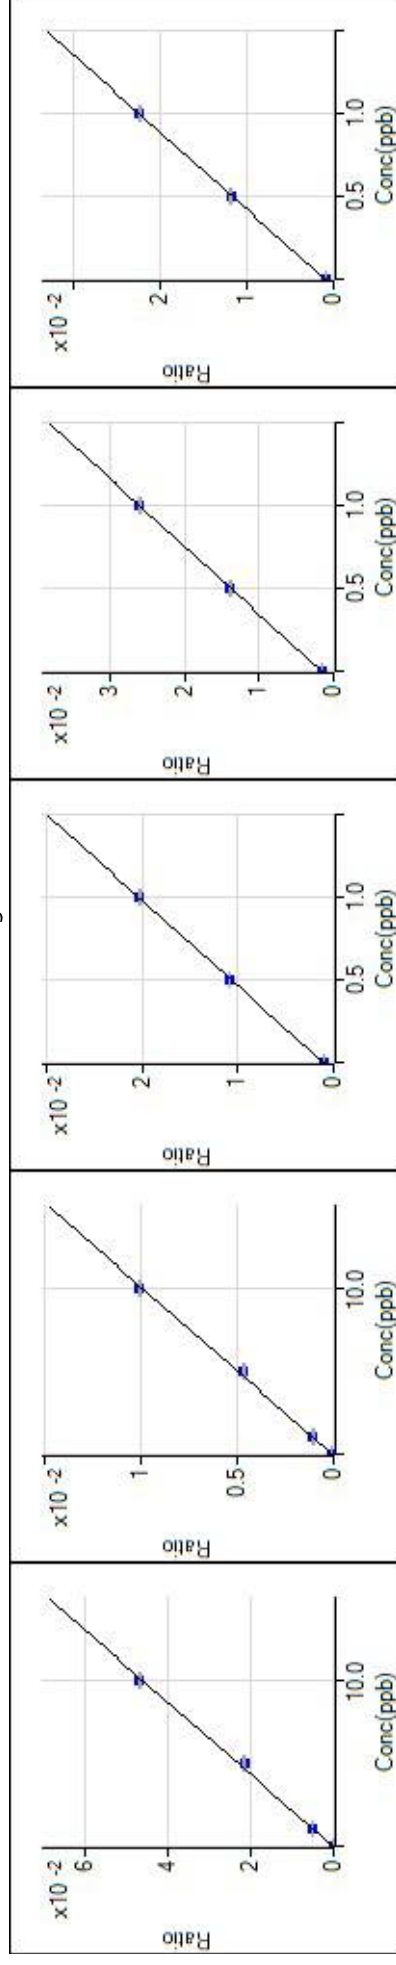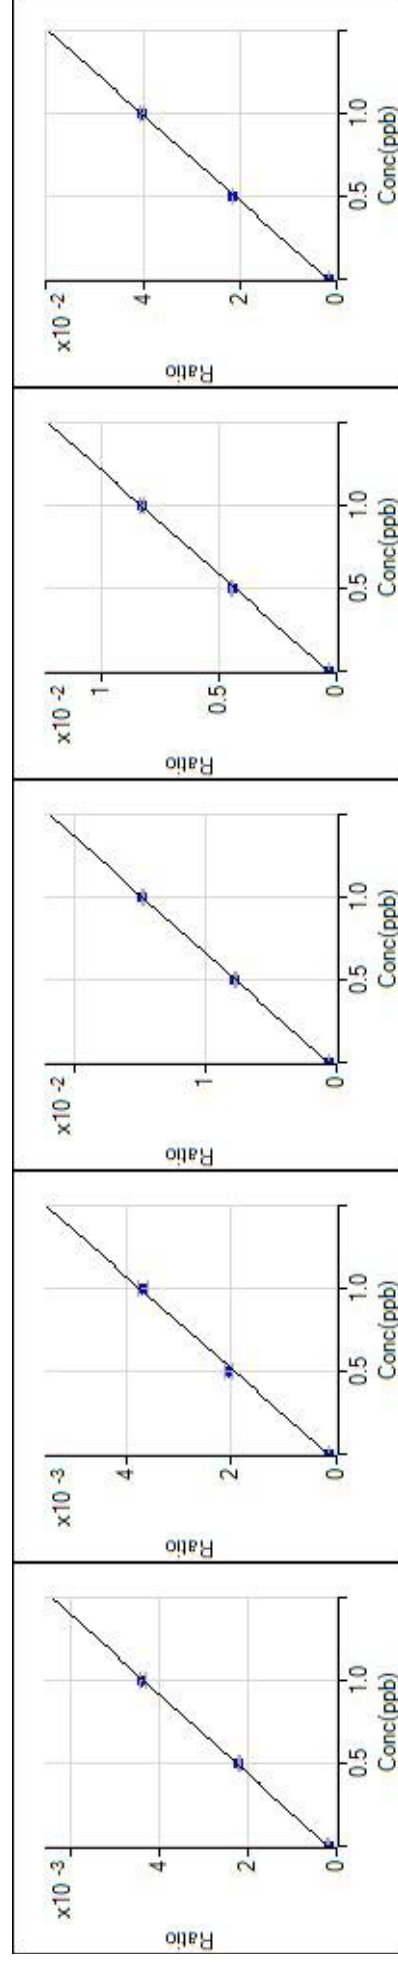

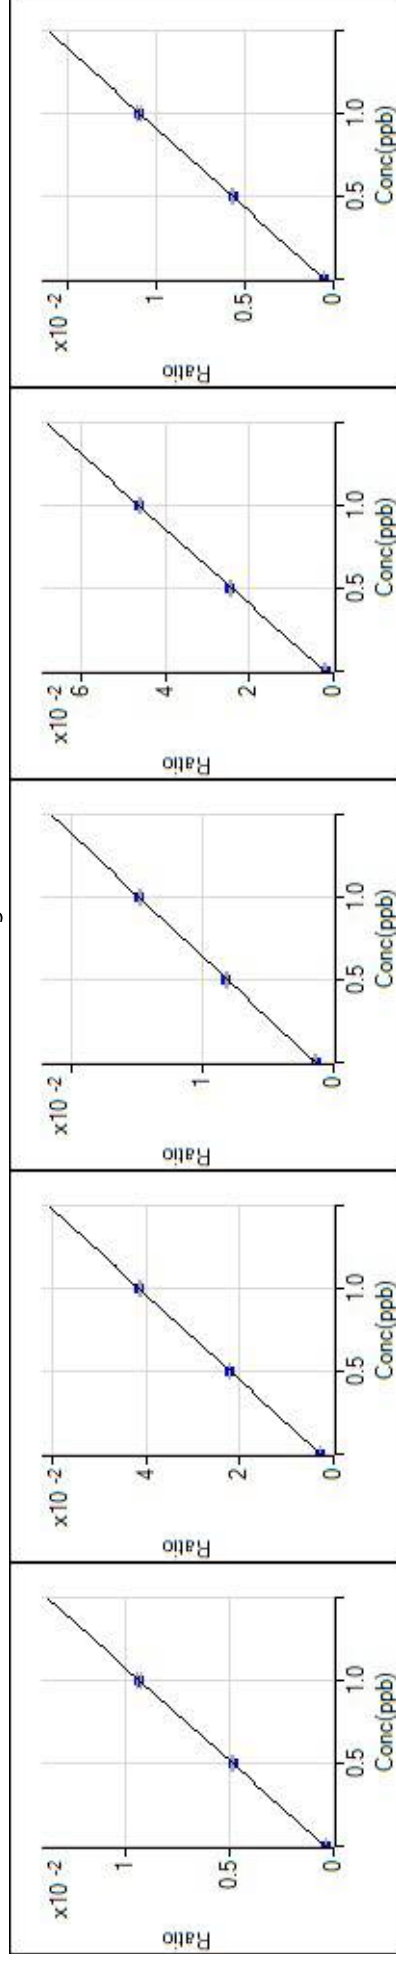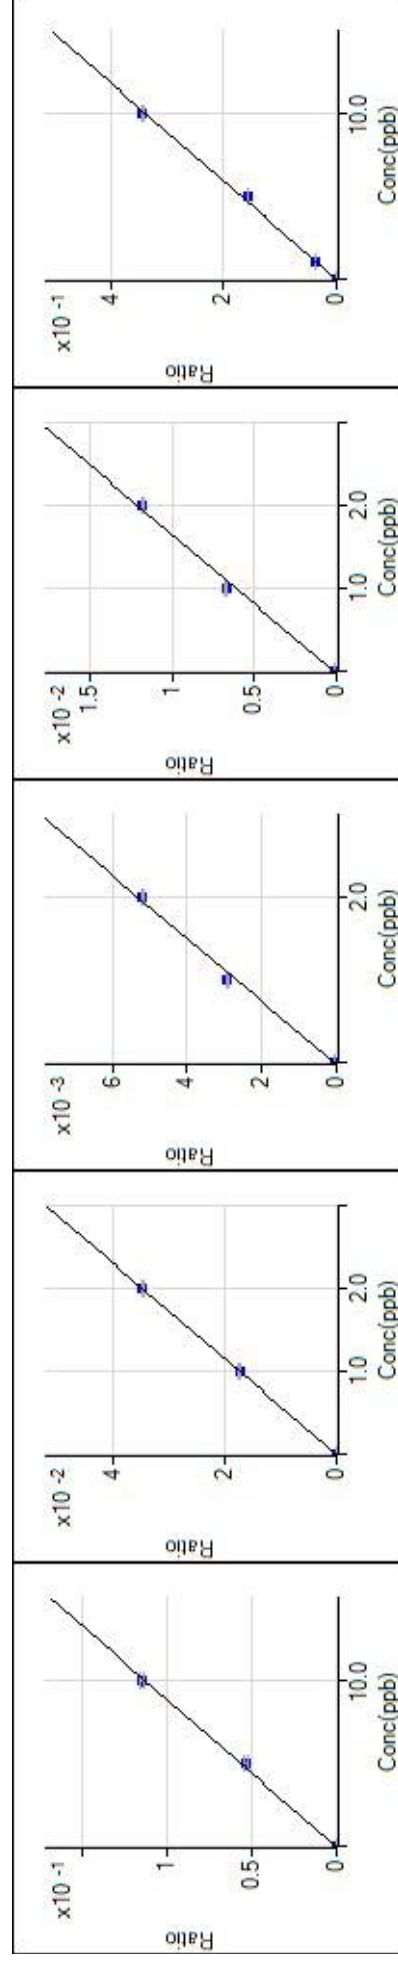

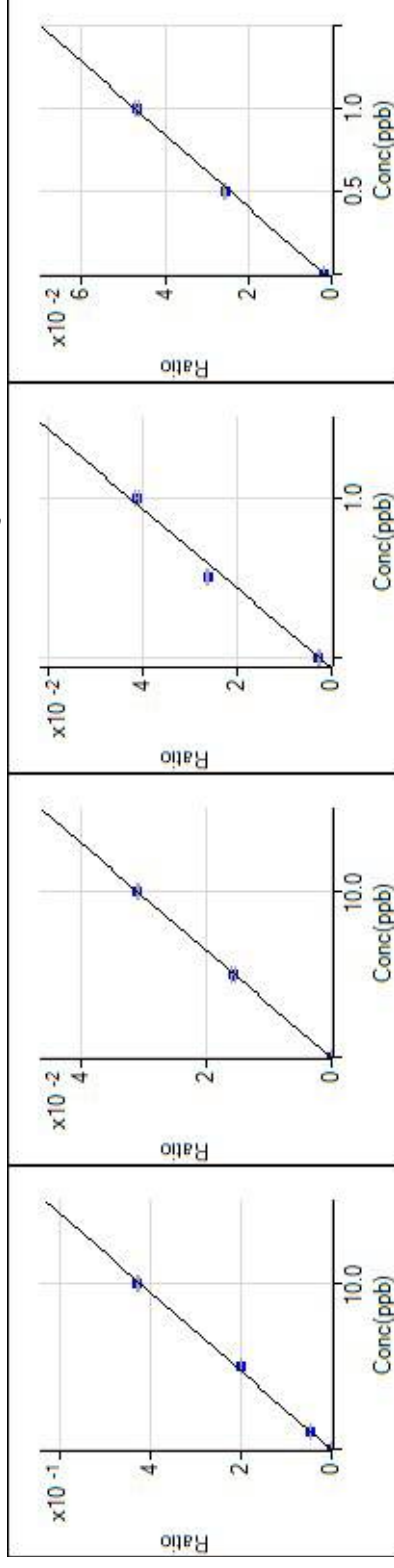

Supplement: s1 [file s1]
